# Supplementary material
Source: publisher figshare collection journal article supplement (https://tandf.figshare.com/articles/dataset/_/4560505)
Supplement: Supplementary file 1 [file 2]

**"Common and specific genes and peripheral biomarkers in children and adults with Attention-Deficit/Hyperactivity Disorder" by Bonvicini et al. for World Journal of Biological Psychiatry**

**Table 2S.** 2-way Contingency Table Analyses for pathways in children and adults with ADHD

| Group | Findings | Children | Adults | Pearson test |    |       | Yates Corrected |    |       | OR   | 95% CI |      |
|-------|----------|----------|--------|--------------|----|-------|-----------------|----|-------|------|--------|------|
|       |          |          |        | $\chi^2$     | df | p     | $\chi^2$        | df | p     |      |        |      |
| 1     | Positive | 117      | 19     | 6.62         | 1  | 0.010 | 5.84            | 1  | 0.016 | 2.27 | 1.15   | 4.47 |
|       | Negative | 87       | 32     |              |    |       |                 |    |       |      |        |      |
| 2     | Positive | 34       | 17     | 0.69         | 1  | 0.41  | 0.32            | 1  | 0.57  |      |        |      |
|       | Negative | 19       | 6      |              |    |       |                 |    |       |      |        |      |
| 3     | Positive | 37       | 21     | 8.31         | 1  | 0.004 | 7.17            | 1  | 0.007 | 3.30 | 1.33   | 8.29 |
|       | Negative | 64       | 11     |              |    |       |                 |    |       |      |        |      |

**Group 1:** Genes specific for ADHD children: SLC6A3=dopamine transporter ; DRD4=dopamine receptor D4; MAOA=monoamine oxidase A; LPHN3=latrophin-3; DIRAS2=GTP-binding RAS-like 2; OPRM1= Opioid Receptor, Mu 1.

**Group 2:** Genes in common in ADHD children & adults: Oxidative stress proteins=MAD (Malondialdehyde), SOD (Superoxide Dismutase), Paraoxonase (PON1), Arylesterase (ARES), total antioxidant status (TAS), total oxidant status (TOS) oxidative stress index (OSI); DISC1= Disrupted In Schizophrenia 1; DBH=dopamine beta hydroxylase; DDC=dopamine decarboxylase; microRNA; adiponectin.

**Group 3:** Genes specific for ADHD adults: CLOCK/PER2/Melatonin/Cortisol=circadian rhythms genes; HTR2A=serotonin receptor 2A; MAOB=monoamine oxidase B; BCHE=acetylcholine metabolizing butyrylcholinesterase; SNAP25=synaptosomal-Associated Protein 25; BAIAP2=BAI1-associated protein 2; NOS1/NO=nitric Oxide Synthase-1, NO (Nitric Oxide metabolite); KCNIP4=kv channel interacting protein 4; SPOCK3=Sparc/Osteonectin, Cwcv And Kazal-Like Domains Proteoglycan (Testican) 3.
